# Supplementary material for: Targeted metabolomics in the expanded newborn screening for inborn errors of metabolism
Source: Royal Society of Chemistry journal article supplement (doi:10.1039/c4mb00729h), 2015-02-06
Supplement: c4mb00729h1.pdf [file c4mb00729h1.pdf]

**Table 1s: Confirmatory tests implemented for disorders diagnosed in our laboratory and reported in Table 1**

|                                                                               | (mmol/mol creatinine, upper-cut off value)                                                                                                          |
|-------------------------------------------------------------------------------|-----------------------------------------------------------------------------------------------------------------------------------------------------|
| <b>MCADD Patient 1</b>                                                        | Adipic acid (850, 32)<br>Suberic acid (1485, 20)                                                                                                    |
| <b>MCADD Patient 2</b>                                                        | Hexanoylglycine (3, nd)                                                                                                                             |
| <b>MCADD Patient 3</b>                                                        | Adipic acid (380, 32)<br>Suberic acid (1220, 20)<br>Sebacic acid (82, 57)<br>Hexanoylglycine (4, nd)                                                |
| <b>MCADD Patient 4</b>                                                        | Adipic acid (36, 32)<br>Suberic acid (63, 20)<br>Sebacic acid (87, 57)<br>Hexanoylglycine (1, nd)<br>Suberylglycine (1, nd)                         |
| <b>MCADD Patient 5</b>                                                        | Suberic acid (45, 20)<br>Sebacic acid (75, 57)<br>Hexanoylglycine (1, nd)<br>Suberylglycine (1, nd)                                                 |
| <b>MMACbIC Patient 1</b>                                                      | Methylmalonic acid (137, 5)                                                                                                                         |
| <b>MMAMut(0) Patient 2</b>                                                    | Methylmalonic acid (7115, 5)<br>Methylcitric acid (127, nd)<br>Lactic acid (824, 25)<br>3-OH-Butiric acid (2120, 9)<br>Acetoacetic acid (815, 1.5)  |
| <b>MMAMut(0) Patient 3</b>                                                    | Methylmalonic acid (5477, 5)<br>Methylcitric acid (69, nd)<br>3-OH-Propionic acid (794, 19)                                                         |
| <b>PA Patient 1</b>                                                           | 3-OH-Propionic acid (335, 19)<br>Methylcitric acid (51, nd)<br>Tiglylglycine (10, nd)<br>Propionylglycine (10, nd)<br>2-Methylbutyrylglycine (3, 2) |
| <b>IVA Patient 1</b>                                                          | Isovalerylglycine (2326, nd)<br>3-Hydroxyisovaleric Acid (234, 18)                                                                                  |
| <b>IBDHD Patient 1</b>                                                        | Isobutyrylglycine (3, nd)                                                                                                                           |
| <b>BKTD Patient 1</b>                                                         | Tiglylglycine (87, nd)<br>2-methyl-3-OH butyric acid (441, 2)                                                                                       |
| <b>SBCADD Patient 1</b>                                                       | Ethylhydracrylic acid (30, 12)<br>2-Methylbutyrylglycine (8, 2)                                                                                     |
| <b>3-Methylcrotonyl-CoA<br/>Carboxylase 2 Deficiency (MCC2)<br/>Patient 1</b> | 3-OH-Isovaleric acid (70, 1.3)<br>3-Methylcrotonylglycine (441, nd)                                                                                 |
