# Supplementary material for: Targeted metabolomics in the expanded newborn screening for inborn errors of metabolism
Source: Royal Society of Chemistry journal article supplement (doi:10.1039/c4mb00729h), 2015-02-06
Supplement: c4mb00729h2.pdf [file c4mb00729h2.pdf]

**Table 2s. List of amino acids and acylcarnitines analyzed in our newborn screening program**

| Name                                                | Abbreviation | Category | Molecular mass<br>(butylated) | Q3 Mass | Experiment<br>type |
|-----------------------------------------------------|--------------|----------|-------------------------------|---------|--------------------|
| Alanine                                             | Ala          | AA       | 146.2                         | 102.1   | NL                 |
| Valine                                              | Val          | AA       | 174.2                         | 102.1   | NL                 |
| Leucine/Isoleucine                                  | Xle          | AA       | 188.2                         | 102.1   | NL                 |
| Methionine                                          | Met          | AA       | 206.2                         | 102.1   | NL                 |
| Phenylalanine                                       | Phe          | AA       | 228.2                         | 102.1   | NL                 |
| Tyrosine                                            | Tyr          | AA       | 238.2                         | 102.1   | NL                 |
| Aspartic Acid                                       | Asp          | AA       | 246.2                         | 102.1   | NL                 |
| Glutamic Acid                                       | Glu          | AA       | 260.2                         | 102.1   | NL                 |
| Glycine                                             | Gly          | AA       | 132.1                         | 76.1    | MRM                |
| Ornithine                                           | Orn          | AA       | 189.3                         | 70.1    | MRM                |
| Arginine                                            | Arg          | AA       | 231.3                         | 70.1    | MRM                |
| Citrulline                                          | Cit          | AA       | 232.3                         | 113.3   | MRM                |
| Free carnitine                                      | C0           | AC       | 218.3                         | 85.1    | PS                 |
| Acetylcarnitine                                     | C2           | AC       | 260.3                         | 85.1    | PS                 |
| Propionylcarnitine                                  | C3           | AC       | 274.3                         | 85.1    | PS                 |
| Iso-/butyrylcarnitine                               | C4           | AC       | 288.3                         | 85.1    | PS                 |
| Tyglylcarnitine                                     | C5:1         | AC       | 300.3                         | 85.1    | PS                 |
| 2-methylbutyryl-/<br>isovalerylcarnitine            | C5           | AC       | 302.3                         | 85.1    | PS                 |
| 3OH butyrylcarnitine                                | C4OH         | AC       | 304.3                         | 85.1    | PS                 |
| Hexanoylcarnitine                                   | C6           | AC       | 316.3                         | 85.1    | PS                 |
| 3-OH isovaleryl-/<br>2-methyl 3-OH butyrylcarnitine | C5OH         | AC       | 318.3                         | 85.1    | PS                 |
| 3-OH hexanoylcarnitine                              | C6OH         | AC       | 332.3                         | 85.1    | PS                 |
| Octenoylcarnitine                                   | C8:1         | AC       | 342.3                         | 85.1    | PS                 |
| Octanoylcarnitine                                   | C8           | AC       | 344.3                         | 85.1    | PS                 |
| Malonylcarnitine                                    | C3DC         | AC       | 360.3                         | 85.1    | PS                 |
| Decadienoylcarnitine                                | C10:2        | AC       | 368.3                         | 85.1    | PS                 |
| Decenoylcarnitine                                   | C10:1        | AC       | 370.3                         | 85.1    | PS                 |
| Decanoylcarnitine                                   | C10          | AC       | 372.3                         | 85.1    | PS                 |
| Methylmalonylcarnitine                              | C4DC         | AC       | 374.4                         | 85.1    | PS                 |
| Glutarylcarnitine                                   | C5DC         | AC       | 388.4                         | 85.1    | PS                 |
| Dodecenoylcarnitine                                 | C12:1        | AC       | 398.4                         | 85.1    | PS                 |
| Dodecanoylcarnitine                                 | C12          | AC       | 400.4                         | 85.1    | PS                 |
| Methylglutarylcarnitine                             | C6DC         | AC       | 402.4                         | 85.1    | PS                 |
| 3-OH dodecanoylcarnitine                            | C12OH        | AC       | 416.4                         | 85.1    | PS                 |
| Tetradecadienoylcarnitine                           | C14:2        | AC       | 424.4                         | 85.1    | PS                 |
| Tetradecenoylcarnitine                              | C14:1        | AC       | 426.4                         | 85.1    | PS                 |
| Tetradecanoylcarnitine                              | C14          | AC       | 428.4                         | 85.1    | PS                 |
| 3-OH tetradecanoylcarnitine                         | C14OH        | AC       | 444.5                         | 85.1    | PS                 |

|                                   |         |    |       |      |    |
|-----------------------------------|---------|----|-------|------|----|
| <b>Hexadecenoylcarnitine</b>      | C16:1   | AC | 454.5 | 85.1 | PS |
| <b>Hexadecanoylcarnitine</b>      | C16     | AC | 456.5 | 85.1 | PS |
| <b>3-OH hexadecenoylcarnitine</b> | C16:1OH | AC | 470.5 | 85.1 | PS |
| <b>3-OH hexadecanoylcarnitine</b> | C16OH   | AC | 472.5 | 85.1 | PS |
| <b>Octadecadienoylcarnitine</b>   | C18:2   | AC | 480.5 | 85.1 | PS |
| <b>Octadecenoylcarnitine</b>      | C18:1   | AC | 482.5 | 85.1 | PS |
| <b>Octadecanoylcarnitine</b>      | C18     | AC | 484.5 | 85.1 | PS |
| <b>3-OH octadecenoylcarnitine</b> | C18:1OH | AC | 498.5 | 85.1 | PS |
| <b>3-OH octadecanoylcarnitine</b> | C18OH   | AC | 500.5 | 85.1 | PS |
